# Supplementary material
Source: PubMed Central journal article supplement (PMC8453399)
Supplement: NIHMS1729608-supplement-Supplemental_Material.pdf [file NIHMS1729608-supplement-Supplemental_Material.pdf]

Supplemental Table 1

Standardized factor loading of ESEM analyses three correlated factor solution at Time 4, 5, and 6 (N = 716).

| Item # | Domain           | Primary scale              | Time 4          |                 |                 | Time 5          |                 |                 | Time 6          |                 |                 |
|--------|------------------|----------------------------|-----------------|-----------------|-----------------|-----------------|-----------------|-----------------|-----------------|-----------------|-----------------|
|        |                  |                            | F1<br>$\lambda$ | F2<br>$\lambda$ | F3<br>$\lambda$ | F1<br>$\lambda$ | F2<br>$\lambda$ | F3<br>$\lambda$ | F1<br>$\lambda$ | F2<br>$\lambda$ | F3<br>$\lambda$ |
| 94     | Social potency   | Persuasive                 | <b>.840</b>     | .035            | .005            | <b>.839</b>     | .072            | .000            | <b>.736</b>     | .110            | <b>.258</b>     |
| 25     | Social potency   | Enjoy visibility/dominance | <b>.543</b>     | -.024           | .111            | <b>.635</b>     | .048            | -.111           | <b>.527</b>     | -.074           | <b>.303</b>     |
| 163    | Social potency   | Likes being in charge      | <b>.428</b>     | .085            | .034            | <b>.394</b>     | -.107           | .093            | <b>.484</b>     | <b>.239</b>     | -.012           |
| 1      | Social potency   | Likes being in charge      | <b>.517</b>     | .054            | .001            | <b>.596</b>     | .001            | -.030           | <b>.584</b>     | .005            | <b>.186</b>     |
| 47     | Social potency   | Enjoy visibility/dominance | <b>.308</b>     | <b>-.261</b>    | <b>.156</b>     | <b>.434</b>     | -.012           | <b>-.270</b>    | <b>.452</b>     | <b>-.261</b>    | <b>.252</b>     |
| 105    | Social potency   | Persuasive                 | <b>.825</b>     | .062            | -.041           | <b>.866</b>     | .041            | <b>-.120</b>    | <b>.724</b>     | .114            | <b>.309</b>     |
| 35     | Social potency   | Enjoy visibility/dominance | <b>.359</b>     | .035            | .068            | <b>.554</b>     | .036            | .021            | <b>.465</b>     | -.007           | <b>.251</b>     |
| 218    | Social potency   | Enjoy visibility/dominance | <b>.197</b>     | <b>-.239</b>    | <b>.193</b>     | <b>.359</b>     | -.058           | <b>-.217</b>    | <b>.265</b>     | <b>-.237</b>    | <b>.233</b>     |
| 257    | Social potency   | Persuasive                 | <b>.332</b>     | <b>-.158</b>    | <b>.279</b>     | <b>.36</b>      | .082            | <b>-.164</b>    | <b>.402</b>     | -.024           | <b>.302</b>     |
| 77     | Harm avoidance   | Dislikes adventures        | <b>.271</b>     | -.136           | <b>.371</b>     | .086            | <b>.343</b>     | <b>-.313</b>    | .023            | -.037           | <b>.442</b>     |
| 33     | Harm avoidance   | Dislikes disaster areas    | <b>.265</b>     | .097            | <b>.406</b>     | .140            | <b>.422</b>     | <b>-.151</b>    | -.005           | .074            | <b>.433</b>     |
| 149    | Harm avoidance   | Dislikes adventures        | <b>.296</b>     | .011            | <b>.255</b>     | <b>.187</b>     | <b>.386</b>     | <b>-.243</b>    | .096            | -.005           | <b>.331</b>     |
| 48     | Stress reaction  | Nervous                    | <b>.221</b>     | <b>-.590</b>    | .037            | .019            | -.117           | <b>-.643</b>    | <b>.209</b>     | <b>-.572</b>    | <b>.191</b>     |
| 222    | Stress reaction  | Sensitive                  | <b>.289</b>     | <b>-.364</b>    | .107            | .075            | <b>.198</b>     | <b>-.438</b>    | <b>.184</b>     | <b>-.400</b>    | <b>.272</b>     |
| 15     | Stress reaction  | Sensitive                  | .054            | <b>-.538</b>    | <b>.292</b>     | -.089           | <b>.175</b>     | <b>-.755</b>    | .057            | <b>-.627</b>    | <b>.273</b>     |
| 209    | Well-being       | Interesting experiences    | <b>.456</b>     | <b>-.251</b>    | .003            | <b>.454</b>     | .018            | <b>-.319</b>    | <b>.376</b>     | <b>-.221</b>    | .099            |
| 256    | Well-being       | Interesting experiences    | <b>.513</b>     | <b>-.245</b>    | .034            | <b>.398</b>     | -.132           | <b>-.212</b>    | <b>.552</b>     | <b>-.164</b>    | .015            |
| 124    | Achievement      | Likes challenges           | <b>.541</b>     | <b>-.148</b>    | -.024           | <b>.406</b>     | .011            | <b>-.215</b>    | <b>.624</b>     | -.021           | .002            |
| 274    | Control          | Tries anticipate events    | <b>-.226</b>    | <b>-.179</b>    | <b>.504</b>     | <b>-.268</b>    | <b>.556</b>     | <b>-.248</b>    | <b>-.373</b>    | -.148           | <b>.572</b>     |
| 28     | Unlikely virtues | Unlikely virtues           | <b>.483</b>     | -.009           | -.044           | <b>.254</b>     | .072            | <b>-.195</b>    | <b>.522</b>     | -.072           | -.020           |
| 97     | Aggression       | Enjoys distressing others  | -.127           | <b>.462</b>     | <b>.436</b>     | -.126           | <b>.662</b>     | .104            | .054            | <b>.534</b>     | <b>.302</b>     |
| 66     | Aggression       | Victimizes for own gain    | <b>.187</b>     | <b>.425</b>     | <b>.282</b>     | <b>.200</b>     | <b>.404</b>     | <b>.177</b>     | <b>.134</b>     | <b>.235</b>     | <b>.303</b>     |
| 172    | Aggression       | Enjoys observing violence  | .067            | <b>.423</b>     | <b>.501</b>     | .050            | <b>.693</b>     | -.022           | .015            | <b>.395</b>     | <b>.523</b>     |
| 202    | Aggression       | Physical violence          | -.002           | <b>.452</b>     | <b>.427</b>     | .082            | <b>.61</b>      | <b>.183</b>     | .056            | <b>.428</b>     | <b>.395</b>     |
| 127    | Aggression       | Vengeful                   | -.117           | <b>.343</b>     | <b>.420</b>     | -.009           | <b>.488</b>     | <b>.154</b>     | -.03            | <b>.357</b>     | <b>.382</b>     |
| 112    | Aggression       | Enjoys distressing others  | <b>.193</b>     | <b>.314</b>     | <b>.253</b>     | <b>.193</b>     | <b>.425</b>     | .089            | .057            | <b>.390</b>     | <b>.280</b>     |

|     |                  |                                  |              |              |              |              |              |              |              |              |             |
|-----|------------------|----------------------------------|--------------|--------------|--------------|--------------|--------------|--------------|--------------|--------------|-------------|
| 232 | Aggression       | Enjoys observing violence        | .054         | <b>.299</b>  | <b>.551</b>  | .098         | <b>.706</b>  | .020         | .02          | <b>.354</b>  | <b>.580</b> |
| 261 | Aggression       | Vengeful                         | .008         | <b>.585</b>  | <b>.401</b>  | <b>.212</b>  | <b>.459</b>  | <b>.345</b>  | <b>.271</b>  | <b>.537</b>  | <b>.389</b> |
| 293 | Aggression       | Physical violence                | -.099        | <b>.562</b>  | <b>.447</b>  | -.016        | <b>.565</b>  | <b>.395</b>  | -.104        | <b>.520</b>  | <b>.349</b> |
| 158 | Aggression       | Enjoys distressing others        | -.001        | <b>.457</b>  | <b>.304</b>  | .154         | <b>.461</b>  | <b>.226</b>  | .107         | <b>.468</b>  | <b>.341</b> |
| 31  | Social closeness | Welcomes support                 | <b>.211</b>  | <b>-.191</b> | -.016        | <b>.349</b>  | <b>-.151</b> | <b>-.259</b> | <b>.330</b>  | <b>-.373</b> | -.058       |
| 60  | Social closeness | Warm/affectionate                | <b>-.436</b> | <b>.304</b>  | <b>.230</b>  | <b>-.274</b> | <b>.358</b>  | <b>.186</b>  | <b>-.478</b> | <b>.221</b>  | <b>.210</b> |
| 152 | Social closeness | Values close relations           | <b>-.422</b> | <b>.195</b>  | <b>.159</b>  | <b>-.393</b> | <b>.220</b>  | .137         | <b>-.51</b>  | .158         | <b>.269</b> |
| 45  | Social closeness | Welcomes support                 | <b>-.184</b> | <b>.464</b>  | -.043        | <b>-.215</b> | <b>.230</b>  | <b>.483</b>  | <b>-.239</b> | <b>.485</b>  | .066        |
| 221 | Social closeness | Warm/affectionate                | <b>-.210</b> | <b>.489</b>  | .008         | <b>-.194</b> | <b>.185</b>  | <b>.547</b>  | <b>-.225</b> | <b>.578</b>  | -.022       |
| 283 | Alienation       | Feels exploited                  | .002         | <b>.652</b>  | -.004        | -.003        | <b>.290</b>  | <b>.579</b>  | -.037        | <b>.716</b>  | .040        |
| 104 | Control          | Cautious careful                 | .056         | .119         | <b>.462</b>  | <b>.151</b>  | <b>.487</b>  | .090         | -.048        | .078         | <b>.600</b> |
| 64  | Control          | Plans ahead                      | .183         | -.054        | <b>.525</b>  | -.008        | <b>.539</b>  | <b>-.131</b> | <b>-.194</b> | -.002        | <b>.591</b> |
| 26  | Control          | Tries anticipate events          | <b>-.481</b> | .000         | <b>.663</b>  | <b>-.373</b> | <b>.694</b>  | -.009        | <b>-.615</b> | .017         | <b>.784</b> |
| 90  | Control          | Sensible, structured             | -.085        | .089         | <b>.415</b>  | -.134        | <b>.466</b>  | -.024        | <b>-.339</b> | -.042        | <b>.501</b> |
| 115 | Control          | Cautious careful                 | -.063        | -.051        | <b>.587</b>  | .030         | <b>.592</b>  | <b>-.145</b> | -.085        | <b>.119</b>  | <b>.564</b> |
| 151 | Control          | Reflective                       | <b>.284</b>  | .115         | <b>.455</b>  | <b>.171</b>  | <b>.545</b>  | .007         | -.032        | <b>.136</b>  | <b>.650</b> |
| 41  | Control          | Reflective                       | -.115        | <b>.291</b>  | <b>.566</b>  | -.113        | <b>.642</b>  | <b>.290</b>  | <b>-.371</b> | <b>.305</b>  | <b>.731</b> |
| 162 | Control          | Sensible, structured             | <b>-.414</b> | -.012        | <b>.715</b>  | <b>-.336</b> | <b>.758</b>  | -.035        | <b>-.546</b> | -.113        | <b>.818</b> |
| 147 | Alienation       | Sees self as target              | -.113        | <b>.575</b>  | .071         | -.049        | <b>.328</b>  | <b>.552</b>  | .006         | <b>.828</b>  | -.081       |
| 238 | Alienation       | Feels betrayed                   | -.123        | <b>.691</b>  | -.075        | -.022        | <b>.183</b>  | <b>.646</b>  | -.018        | <b>.796</b>  | -.004       |
| 298 | Alienation       | Believes others wish him to fail | .038         | <b>.630</b>  | .082         | .113         | <b>.27</b>   | <b>.476</b>  | .108         | <b>.674</b>  | .030        |
| 178 | Alienation       | Sees self as target              | -.003        | <b>.498</b>  | .056         | .029         | <b>.345</b>  | <b>.455</b>  | .089         | <b>.634</b>  | .048        |
| 95  | Stress reaction  | Mood swings                      | .052         | <b>.681</b>  | <b>-.176</b> | <b>.170</b>  | -.029        | <b>.758</b>  | -.075        | <b>.737</b>  | -.086       |
| 131 | Stress reaction  | Mood swings                      | .005         | <b>.732</b>  | -.056        | <b>.260</b>  | .008         | <b>.730</b>  | -.108        | <b>.724</b>  | -.025       |
| 212 | Stress reaction  | Easily upset                     | -.044        | <b>.580</b>  | .017         | <b>.266</b>  | -.015        | <b>.634</b>  | .001         | <b>.554</b>  | -.010       |
| 270 | Stress reaction  | Nervous                          | .045         | <b>.689</b>  | .110         | .102         | <b>.240</b>  | <b>.641</b>  | -.020        | <b>.751</b>  | .008        |
| 82  | Aggression       | Physical violence                | .014         | <b>.671</b>  | <b>.277</b>  | -.002        | <b>.482</b>  | <b>.366</b>  | -.001        | <b>.530</b>  | <b>.341</b> |
| 22  | Aggression       | Vengeful                         | .111         | <b>.501</b>  | <b>.358</b>  | .125         | <b>.483</b>  | <b>.297</b>  | .112         | <b>.499</b>  | <b>.415</b> |

*Note.* Factor loadings for Time 3 are reported in the main text. Item #, scale, and subscale refer to the 300-item version of the Multidimensional Personality Questionnaire (MPQ). The three blocks of items denote a-priori Boldness, Meanness, and Disinhibition items, respectively. Statistically significant factor loadings are reported in bold typeface.

Supplemental Table 2

Construct validity analyses for the MPQ-based triarchic psychopathy scales at time point 3 ( $M_{age} = 16.08$ ,  $SD = .45$ ).

| Construct                | $M(SD)$         | $n$ | Correlations ( $r$ ) |          |               | Regressions ( $\beta/B$ ) <sup>a</sup> |                 |               | $R^2/R^2_N$ |
|--------------------------|-----------------|-----|----------------------|----------|---------------|----------------------------------------|-----------------|---------------|-------------|
|                          |                 |     | Boldness             | Meanness | Disinhibition | Boldness                               | Meanness        | Disinhibition |             |
| DI affective             | 21.67(12.71)    | 230 | -.048                | .002     | -.016         | -.049                                  | .020            | -.027         | .003        |
| DI behavioral            | 26.94(13.79)    | 230 | .018                 | -.048    | -.064         | .020                                   | -.018           | -.054         | .005        |
| DI cognitive             | 29.12(9.83)     | 230 | .029                 | .049     | -.021         | .025                                   | .091            | -.074         | .007        |
| DUSI alcohol             | .41(.746)       | 463 | -.04                 | .058     | .094          | -.041                                  | .007            | .090          | .011        |
| DUSI marijuana           | .43(.985)       | 463 | -.008                | .154**   | .216***       | -.012                                  | .043            | .191**        | .048***     |
| ABS substance use        | 5.12(12.26)     | 618 | .005                 | .297***  | .283***       | -.005                                  | .200***         | .166***       | .107***     |
| ABS behavioral problems  | 23.44(19.79)    | 618 | -.108**              | .422***  | .553***       | -.119***                               | .157***         | .463***       | .335***     |
| ABS health status        | 24.44(14.97)    | 618 | -.007                | .231***  | .359***       | -.011                                  | .033            | .340***       | .130***     |
| ABS psychiatric disorder | 19.98(17.50)    | 618 | -.153***             | .333***  | .485***       | -.160***                               | .086            | .436***       | .265***     |
| ABS social competence    | 15.06(19.94)    | 618 | -.249***             | .208***  | .349***       | -.253***                               | .022            | .339***       | .186***     |
| ABS family system        | 17.15(19.56)    | 618 | -.033                | .344***  | .427***       | -.043                                  | .146**          | .342***       | .198***     |
| ABS school performance   | 22.79(19.88)    | 618 | -.116**              | .446***  | .493***       | -.130***                               | .248***         | .349***       | .298***     |
| ABS work adjustment      | 5.09(8.61)      | 618 | -.034                | .350***  | .283***       | -.048                                  | .283***         | .118          | .134***     |
| ABS peer relationships   | 26.55(22.31)    | 618 | .028                 | .399***  | .417***       | .015                                   | .235***         | .280***       | .211***     |
| ABS leisure/recreation   | 24.91(19.00)    | 618 | -.216***             | .386***  | .399***       | -.229***                               | .246***         | .257***       | .247***     |
| ABS total score          | 18.91(12.92)    | 618 | -.128                | .483***  | .585***       | -.142***                               | .224***         | .455***       | .393***     |
| Alcohol use (Y/N)        | Y=392,<br>N=384 | 623 | .011                 | .196***  | .164***       | .029                                   | 1.578**         | .762          | .056***     |
| Marijuana use (Y/N)      | Y=349,<br>N=427 | 623 | -.028                | .253***  | .187***       | OR 1.03<br>-.524                       | 4.84<br>2.42*** | 2.14<br>.642  | .093***     |
|                          |                 |     |                      |          |               | OR .59                                 | 11.28           | 1.90          |             |

Note. DI = Dysregulation Inventory. DUSI = Drug Use Screening Inventory (number of uses in the past year). ABS = Absolute Problem Density Profile. For ease of readability, only significant regression coefficients ( $\beta/B$ ) are displayed.  $M(SD)$  = Means and standard deviations for the criterion variables in all available cases.  $n$  = valid cases for the analyses involving the MPQ-triarchic scales. OR = Odd Ratio.

<sup>a</sup>  $B$  coefficients based on logistic regression analyses are reported for Alcohol and Marijuana use (Y/N), with corresponding Nagelkerke's  $R^2$  ( $R^2_N$ )

\*\*  $p < .01$ . \*\*\*  $p < .001$ .

Supplemental Table 3

Construct validity analyses for the MPQ-based triarchic psychopathy scales at time point 4 ( $M_{age} = 18.84$ ,  $SD = .48$ ).

| Construct                           | $M(SD)$         | $n$ | Correlations ( $r$ ) |          |               | Regressions ( $\beta/B$ ) <sup>a</sup> |          |               | $R^2/R^2_N$ |
|-------------------------------------|-----------------|-----|----------------------|----------|---------------|----------------------------------------|----------|---------------|-------------|
|                                     |                 |     | Boldness             | Meanness | Disinhibition | Boldness                               | Meanness | Disinhibition |             |
| DI affective                        | 17.46(11.94)    | 449 | -.081                | .010     | .030          | -.086                                  | .047     | .152**        | .040***     |
| DI behavioral                       | 22.02(13.22)    | 449 | .033                 | .117     | .185***       | .027                                   | .012     | .177**        | .035**      |
| DI cognitive                        | 26.58(9.74)     | 449 | -.056                | .191***  | .227***       | -.062                                  | .088     | .177**        | .061***     |
| DUSI alcohol                        | 1.13(1.11)      | 452 | -.006                | .191***  | .147**        | -.009                                  | .160**   | .053          | .038**      |
| DUSI marijuana                      | .96(1.39)       | 452 | -.018                | .164***  | .181***       | -.023                                  | .088     | .130          | .038**      |
| ABS substance use                   | 10.80(16.69)    | 566 | .062                 | .312***  | .328***       | .054                                   | .184***  | .218***       | .132***     |
| ABS behavioral problems             | 19.15(17.28)    | 566 | -.095                | .438***  | .516***       | -.110                                  | .205***  | .398***       | .306***     |
| ABS health status                   | 23.60(15.37)    | 566 | -.157***             | .087     | .187***       | -.163***                               | -.037    | .213***       | .062***     |
| ABS psychiatric disorder            | 18.96(17.98)    | 566 | -.163***             | .329***  | .501***       | -.178***                               | .050     | .477***       | .285***     |
| ABS social competence               | 14.97(16.18)    | 566 | -.212***             | .233***  | .309***       | -.221                                  | .075     | .272***       | .148***     |
| ABS family system                   | 17.21(20.35)    | 566 | -.089                | .294***  | .378***       | -.099                                  | .109     | .317***       | .160***     |
| ABS school performance              | 22.99(20.79)    | 566 | -.026                | .390***  | .446***       | -.038                                  | .195***  | .332***       | .225***     |
| ABS work adjustment                 | 8.42(13.27)     | 566 | -.009                | .459***  | .433***       | -.020                                  | .312***  | .250***       | .251***     |
| ABS peer relationships              | 30.28(24.16)    | 566 | -.002                | .408***  | .427***       | -.013                                  | .240***  | .286***       | .220***     |
| ABS leisure/recreation              | 27.73(19.39)    | 566 | -.139**              | .314***  | .398***       | -.150***                               | .120     | .332***       | .190***     |
| ABS total score                     | 19.54(13.40)    | 566 | -.109**              | .467***  | .564***       | -.125***                               | .205***  | .447***       | .361***     |
| Y-DMC Total                         | 0.00 (1.00)     | 514 | .200***              | -.187*** | -.215***      | .206***                                | -.089    | -.170**       | .094***     |
| Alcohol use (Y/N)                   | Y=571,<br>N=205 | 569 | .114**               | .214***  | .227***       | 1.29**                                 | 1.49     | 1.71**        | .101***     |
| Marijuana use (Y/N)                 | Y=441,<br>N=335 | 569 | -.033                | .232***  | .288***       | OR 4.84                                | 4.84     | 4.84          |             |
|                                     |                 |     |                      |          |               | OR -.48                                | 1.06     | 2.47***       | .119***     |
|                                     |                 |     |                      |          |               | OR .620                                | 2.873    | 11.87         |             |
| YASR Social competency <sup>b</sup> | 48.66(7.39)     | 430 | .100                 | -.207*** | -.220***      | .105                                   | -.117    | -.155**       | .069***     |
| YASR Internalizing <sup>b</sup>     | 45.90(10.75)    | 430 | -.110                | .166***  | .173***       | -.115                                  | .098     | .119          | .050***     |
| YASR Externalizing <sup>b</sup>     | 48.49(10.47)    | 430 | .046                 | .205***  | .243***       | .040                                   | .095     | .186**        | .066***     |

Note. DI = Dysregulation Inventory. DUSI = Drug Use Screening Inventory (number of uses in the past year). ABS = Absolute Problem Density Profile. Y-DMC = Youth Decision Making Competence Measure. YASR = Young Adult Self-Report. For ease of readability, only significant regression coefficients ( $\beta$ ) are displayed.  $M(SD)$  = Means and standard deviations for the criterion variables in all available cases.  $n$  = valid cases for the analyses involving the MPQ-triarchic scales. OR = Odd Ratio.

<sup>a</sup>  $B$  coefficients based on logistic regression analyses are reported for Alcohol and Marijuana use (Y/N), with corresponding Nagelkerke's  $R^2$  ( $R^2_N$ )

<sup>b</sup> T-score (see Measures section)

\*\*  $p < .01$ . \*\*\*  $p < .001$ .

Supplemental Table 4

Construct validity analyses for the MPQ-based triarchic psychopathy scales at time point 5 ( $M_{age} = 21.89$ ,  $SD = .43$ ).

| Construct                           | $M(SD)$         | $n$ | Correlations ( $r$ ) |          |               | Regressions ( $\beta/B$ ) <sup>a</sup> |          |               | $R^2/R^2_N$ |
|-------------------------------------|-----------------|-----|----------------------|----------|---------------|----------------------------------------|----------|---------------|-------------|
|                                     |                 |     | Boldness             | Meanness | Disinhibition | Boldness                               | Meanness | Disinhibition |             |
| DI affective                        | 17.21(12.52)    | 472 | -.169**              | .224***  | .269***       | -.173**                                | .105     | .199**        | .106***     |
| DI behavioral                       | 22.18(13.95)    | 472 | -.075                | .211***  | .257***       | -.078                                  | .086     | .201**        | .075***     |
| DI cognitive                        | 25.90(9.93)     | 472 | -.203***             | .218***  | .302***       | -.204***                               | .060     | .261***       | .134***     |
| DUSI alcohol                        | 1.83(1.13)      | 448 | .017                 | .135     | .197***       | .018                                   | .010     | .191**        | .039**      |
| DUSI marijuana                      | 1.00(1.47)      | 448 | -.001                | .135     | .134          | -.005                                  | .084     | .079          | .022        |
| ABS substance use                   | 14.86(19.16)    | 475 | .006                 | .345***  | .391***       | -.001                                  | .158**   | .288***       | .167***     |
| ABS behavioral problems             | 18.29(18.07)    | 475 | -.059                | .509***  | .562***       | -.070                                  | .258***  | .394***       | .356***     |
| ABS health status                   | 24.34(17.23)    | 475 | -.077                | .206***  | .335***       | -.073                                  | -.010    | .340***       | .117***     |
| ABS psychiatric disorder            | 18.16(18.27)    | 475 | -.142**              | .348***  | .521***       | -.139***                               | .034     | .497***       | .290***     |
| ABS social competence               | 15.77(17.05)    | 475 | -.186***             | .300***  | .428***       | -.185***                               | .058     | .389***       | .218***     |
| ABS family system                   | 15.08(17.93)    | 475 | -.100                | .331***  | .440***       | -.101***                               | .090     | .380***       | .207***     |
| ABS school performance              | 14.82(18.67)    | 475 | -.026                | .341***  | .417***       | -.030                                  | .125     | .335***       | .183***     |
| ABS work adjustment                 | 8.97(15.52)     | 475 | .006                 | .432***  | .495***       | -.001                                  | .192***  | .370***       | .266***     |
| ABS peer relationships              | 26.74(21.67)    | 475 | .050                 | .483***  | .503***       | .038                                   | .267***  | .330***       | .297***     |
| ABS leisure/recreation              | 29.81(20.73)    | 475 | -.102                | .399***  | .451***       | -.110**                                | .197***  | .322***       | .235***     |
| ABS total score                     | 18.43(13.61)    | 475 | -.085                | .513***  | .627***       | -.091                                  | .193***  | .501***       | .420***     |
| Alcohol use (Y/N)                   | Y=711,<br>N=65  | 776 | .081                 | .188***  | .193***       | 1.14                                   | 1.99     | 2.18          | .098***     |
| Marijuana use (Y/N)                 | Y=503,<br>N=273 | 776 | .030                 | .285***  | .258***       | OR                                     | 3.14     | 7.28          | 8.87        |
|                                     |                 |     |                      |          |               | OR                                     | 1.29     | 10.05         | 3.82        |
| YASR Social competency <sup>b</sup> | 48.98(7.37)     | 392 | .256***              | -.238*** | -.236***      | .265***                                | -.176    | -.120         | .138***     |
| YASR Internalizing <sup>b</sup>     | 46.28(10.84)    | 392 | -.163**              | .205***  | .204***       | -.170**                                | .144     | .109          | .079***     |
| YASR Externalizing <sup>b</sup>     | 48.14(10.63)    | 392 | -.077                | .276***  | .346***       | -.080                                  | .098     | .282***       | .131***     |
| Self-reported violence              | 1.69(2.06)      | 476 | .131**               | .467***  | .404***       | .113**                                 | .342***  | .183**        | .249***     |
| ASPD symptom count                  | .81(1.29)       | 488 | .009                 | .421***  | .443***       | -.001                                  | .231***  | .294***       | .227***     |

Note. DI = Dysregulation Inventory. DUSI = Drug Use Screening Inventory (number of uses in the past year). ABS = Absolute Problem Density Profile. YASR = Young Adult Self-Report. ASPD = Antisocial Personality Disorder. For ease of readability, only significant regression coefficients ( $\beta$ ) are displayed.  $M(SD)$  = Means and standard deviations for the criterion variables in all available cases.  $n$  = valid cases for the analyses involving the MPQ-triarchic scales.

<sup>a</sup>  $B$  coefficients based on logistic regression analyses are reported for Alcohol and Marijuana use (Y/N), with corresponding Nagelkerke's  $R^2$  ( $R^2_N$ )

<sup>b</sup> T-score (see Measures section)

\* $p < .05$ . \*\* $p < .01$ . \*\*\* $p < .001$ .

Supplemental Table 5

Construct validity analyses for the MPQ-based triarchic psychopathy scales at time point 6 ( $M_{age} = 24.89$ ,  $SD = .32$ ).

| Construct              | $M(SD)$      | $n$ | Correlations ( $r$ ) |          |               | Regressions ( $\beta$ ) |          |               | $R^2$   |
|------------------------|--------------|-----|----------------------|----------|---------------|-------------------------|----------|---------------|---------|
|                        |              |     | Boldness             | Meanness | Disinhibition | Boldness                | Meanness | Disinhibition |         |
| DI affective           | 15.30(11.14) | 388 | -.107                | .131     | .235***       | -.123                   | -.010    | .250***       | .071*** |
| DI behavioral          | 19.28(13.16) | 388 | -.007                | .158**   | .243***       | -.010                   | .015     | .235***       | .059*** |
| DI cognitive           | 24.88(10.25) | 388 | -.119**              | .183***  | .304***       | -.141**                 | .007     | .310***       | .112*** |
| YASR Social competency | 48.27(7.84)  | 220 | .079                 | -.177**  | -.214**       | .099                    | -.082    | -.171         | .059**  |
| YASR Internalizing     | 45.92(11.01) | 220 | -.103                | .213**   | .276***       | -.128                   | .081     | .236***       | .095*** |
| YASR Externalizing     | 47.40(9.25)  | 220 | .055                 | .199**   | .330***       | .033                    | -.009    | .334***       | .110*** |
| Self-reported violence | 1.69(2.06)   | 395 | .191***              | .367***  | .337***       | .154**                  | .242***  | .178**        | .178*** |
| ASPD symptom count     | .82(1.23)    | 469 | .017                 | .484***  | .412***       | -.033                   | .375***  | .184***       | .257*** |

Note. DI = Dysregulation Inventory. YASR = Young Adult Self-Report. ASPD = Antisocial Personality Disorder. For ease of readability, only significant regression coefficients ( $\beta$ ) are displayed.  $M(SD)$  = Means and standard deviations for the criterion variables in all available cases.  $n$  = valid cases for the analyses involving the MPQ-triarchic scales.

\*\*  $p < .01$ . \*\*\*  $p < .001$ .
